# Supplementary material for: Anti-NMDA receptor encephalitis and MOG-associated demyelination – a case report with long-term follow-up and a systematic review
Source: PubMed Central journal article supplement (PMC9667590; doi:10.1186/s12883-022-02974-x), 2022-11-16

**Supplemental Figure:** Flowchart of included articles

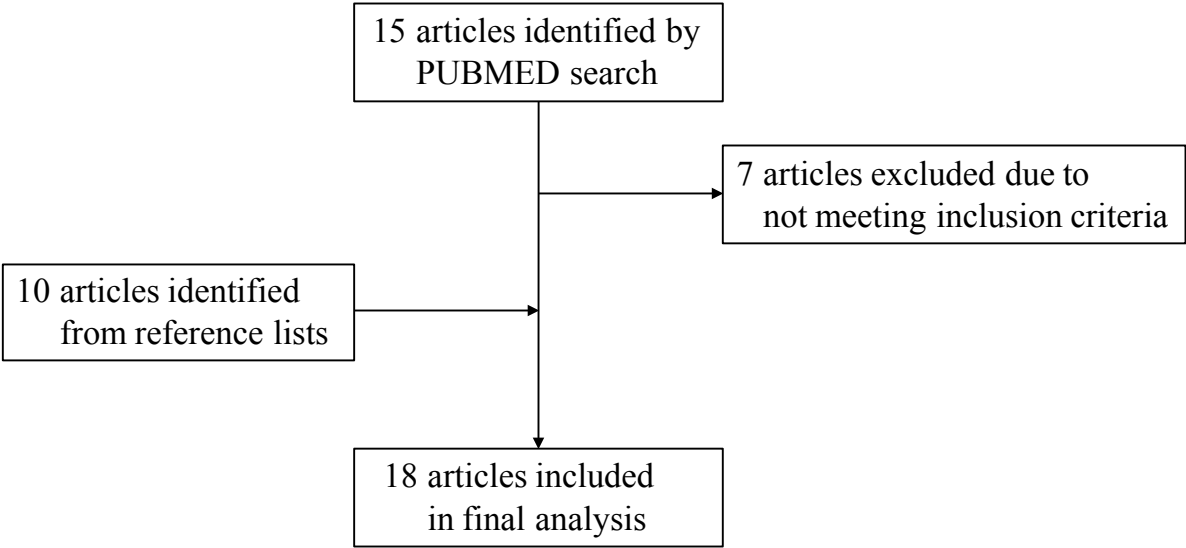

Supplement: 12883_2022_2974_MOESM1_ESM.pdf [file 12883_2022_2974_MOESM1_ESM.pdf]
