# Supplementary material for: Anti-NMDA receptor encephalitis and MOG-associated demyelination – a case report with long-term follow-up and a systematic review
Source: PubMed Central journal article supplement (PMC9667590; doi:10.1186/s12883-022-02974-x), 2022-11-16
Supplement: 12883_2022_2974_MOESM2_ESM.pdf [file 12883_2022_2974_MOESM2_ESM.pdf]

**Supplemental Table:** Radiological findings in MOG IgG positive patients with NMDAR encephalitis

| Ref | Patient Number | MRI findings        |           |                                        |                           |                                  |                                    |                                       |                               | PET/SPECT<br>normal, n /<br>abnormal, n |
|-----|----------------|---------------------|-----------|----------------------------------------|---------------------------|----------------------------------|------------------------------------|---------------------------------------|-------------------------------|-----------------------------------------|
|     |                | Number of MRI scans | Normal, n | Presence of T2 hyperintense lesions, n | Presence of CE lesions, n | Presence of bilateral lesions, n | Presence of supratentorial lesions | Presence of infratentorial lesions, n | Presence of spinal lesions, n |                                         |
| (1) | 1              | 3                   | 0         | 3                                      | 1                         | 1                                | 2                                  | 2                                     | 0                             | n.a.                                    |
| (1) | 2              | 3                   | 0         | 3                                      | 0                         | 1                                | 2                                  | 2                                     | 1                             | n.a.                                    |
| (1) | 3              | 4                   | 0         | 4                                      | 0                         | 1                                | 2                                  | 3                                     | 0                             | n.a.                                    |
| (1) | 4              | 3                   | 0         | 3                                      | 0                         | 2                                | 2                                  | 3                                     | 1                             | n.a.                                    |
| (1) | 5              | 2                   | 0         | 2                                      | 1                         | 1                                | 2                                  | 0                                     | 0                             | n.a.                                    |
| (1) | 6              | 2                   | 0         | 1                                      | 2                         | 1                                | 2                                  | 0                                     | 0                             | n.a.                                    |
| (1) | 7              | 3                   | 0         | 3                                      | 0                         | 0                                | 3                                  | 2                                     | 0                             | n.a.                                    |
| (1) | 8              | 1                   | 0         | 1                                      | 0                         | 1                                | 1                                  | 1                                     | 0                             | n.a.                                    |
| (1) | 9              | 1                   | 0         | 1                                      | 1                         | 1                                | 1                                  | 1                                     | 1                             | n.a.                                    |
| (2) | 10             | 2                   | 0         | 1                                      | 1                         | 1                                | 2                                  | 1                                     | 0                             | n.a.                                    |
| (3) | 11             | 2                   | 0         | 2                                      | 0                         | 0                                | 1                                  | 1                                     | 0                             | n.a.                                    |
| (4) | 12             | 1                   | 0         | 1                                      | 0                         | 1                                | 1                                  | 1                                     | 1                             | n.a.                                    |
| (5) | 13             | 2                   | 0         | 2                                      | 1                         | 2                                | 2                                  | 1                                     | 0                             | n.a.                                    |
| (5) | 14             | 3                   | 0         | 3                                      | 1                         | 1                                | 2                                  | 3                                     | 0                             | n.a.                                    |
| (5) | 15             | 5                   | 0         | 5                                      | 0                         | 4                                | 5                                  | 3                                     | 0                             | n.a.                                    |
| (5) | 16             | 1                   | 0         | 1                                      | 0                         | 0                                | 1                                  | 0                                     | 0                             | n.a.                                    |
| (5) | 17             | 2                   | 1         | 1                                      | 0                         | 0                                | 1                                  | 0                                     | 0                             | n.a.                                    |
| (6) | 18             | 2                   | 1         | 1                                      | 0                         | 0                                | 1                                  | 0                                     | 0                             | n.a.                                    |
| (7) | 19             | 2                   | 0         | 2                                      | 1                         | 2                                | 2                                  | 1                                     | 0                             | 0 / 1 <sup>a</sup>                      |

|              |           |           |                |                 |                 |                 |                 |                 |               |                          |
|--------------|-----------|-----------|----------------|-----------------|-----------------|-----------------|-----------------|-----------------|---------------|--------------------------|
| (8)          | 20        | 3         | 0              | 3               | 2               | 1               | 3               | 0               | 0             | n.a.                     |
| (9)          | 21        | 1         | 1              | 0               | 0               | 0               | 0               | 0               | 0             | n.a.                     |
| (10)         | 22        | 3         | 0              | 3               | 0               | 0               | 2               | 1               | 0             | n.a.                     |
| (11)         | 23        | 2         | 0              | 2               | 0               | 2               | 2               | 0               | 0             | n.a.                     |
| (12)         | 24        | 3         | 0              | 3               | 1               | 1               | 1               | 2               | 0             | n.a.                     |
| (12)         | 25        | 1         | 0              | 1               | 1               | 0               | 1               | 0               | 0             | n.a.                     |
| (13)         | 26        | 2         | 2              | 2               | 0               | 0               | 1               | 2               | 1             | n.a.                     |
| (14)         | 27        | 1         | 0              | 1               | 0               | 1               | 1               | 1               | 0             | n.a.                     |
| (15)         | 28        | 3         | 0              | 3               | 3               | 1               | 1               | 3               | 0             | n.a.                     |
| (16)         | 29        | 2         | 1              | 1               | 1               | 1               | 1               | 0               | 0             | n.a.                     |
| (17)         | 30        | 1         | 1              | 1               | 0               | 1               | 1               | 0               | 0             | n.a.                     |
| (18)         | 31        | 1         | 0              | 1               | 1               | 1               | 1               | 1               | 0             | 1 / 0                    |
| <b>Total</b> | <b>31</b> | <b>70</b> | <b>7 (10%)</b> | <b>61 (87%)</b> | <b>18 (26%)</b> | <b>28 (40%)</b> | <b>50 (71%)</b> | <b>34 (49%)</b> | <b>4 (6%)</b> | <b>1 / 1<sup>a</sup></b> |

Legend:

<sup>a</sup> SPECT showed reduced uptake (marker: technetium-99m ethyl cysteinate dimer) in the medial aspect of the frontal lobe, brainstem and basal ganglia.

CE = Contrast enhancing; DE = Demyelination; E = NMDAR-encephalitis; N = Number; OCB = Oligoclonal bands; PET = Positron emission tomography; Ref = Reference; SPECT = Single photon emission computed tomography.

## References

1. Titulaer MJ, Höftberger R, Iizuka T, Leypoldt F, McCracken L, Cellucci T, et al. Overlapping demyelinating syndromes and anti-N-methyl-D-aspartate receptor encephalitis. *Ann Neurol*. 2014;75(3):411-28.
2. Yokoyama K, Hori M, Yoshida A. Anti-myelin oligodendrocyte glycoprotein antibody neuritis optica following anti-NMDA receptor encephalitis. *Pediatr Int*. 2016;58(9):953-4.
3. Zhou L, Zhang Bao J, Li H, Li X, Huang Y, Wang M, et al. Cerebral cortical encephalitis followed by recurrent CNS demyelination in a patient with concomitant anti-MOG and anti-NMDA receptor antibodies. *Mult Scler Relat Disord*. 2017;18:90-2.
4. Zhou J, Tan W, Tan SE, Hu J, Chen Z, Wang K. An unusual case of anti-MOG CNS demyelination with concomitant mild anti-NMDAR encephalitis. *J Neuroimmunol*. 2018;320:107-10.
5. Fan S, Xu Y, Ren H, Guan H, Feng F, Gao X, et al. Comparison of myelin oligodendrocyte glycoprotein (MOG)-antibody disease and AQP4-IgG-positive neuromyelitis optica spectrum disorder (NMOSD) when they co-exist with anti-NMDA (N-methyl-D-aspartate) receptor encephalitis. *Mult Scler Relat Disord*. 2018;20:144-52.
6. Rojc B, Podnar B, Graus F. A case of recurrent MOG antibody positive bilateral optic neuritis and anti-NMDAR encephalitis: Different biological evolution of the two associated antibodies. *J Neuroimmunol*. 2019;328:86-8.
7. Aoe S, Kokudo Y, Takata T, Kobara H, Yamamoto M, Touge T, et al. Repeated anti-N-methyl-D-aspartate receptor encephalitis coexisting with anti-myelin oligodendrocyte glycoprotein antibody-associated diseases: A case report. *Mult Scler Relat Disord*. 2019;35:182-4.
8. Taraschenko O, Zabad R. Overlapping demyelinating syndrome and anti-N-methyl-d-aspartate receptor encephalitis with seizures. *Epilepsy Behav Rep*. 2019;12:100338.
9. Sarigecili E, Cobanogullari MD, Komur M, Okuyaz C. A rare concurrence: Antibodies against Myelin Oligodendrocyte Glycoprotein and N-methyl-d-aspartate receptor in a child. *Mult Scler Relat Disord*. 2019;28:101-3.
10. Perez CA, Agyei P, Gogia B, Harrison R, Samudralwar R. Overlapping autoimmune syndrome: A case of concomitant anti-NMDAR encephalitis and myelin oligodendrocyte glycoprotein (MOG) antibody disease. *J Neuroimmunol*. 2020;339:577124.
11. Ma J, Jiang L. Viral encephalitis followed by anti-NMDAR encephalitis with concomitant MOG antibody-positive central nervous system demyelination in a child. *Neurol Sci*. 2020;41(8):2303-5.
12. Wegener-Panzer A, Cleaveland R, Wendel EM, Baumann M, Bertolini A, Hausler M, et al. Clinical and imaging features of children with autoimmune encephalitis and MOG antibodies. *Neurol Neuroimmunol Neuroinflamm*. 2020;7(4).
13. Nan D, Zhang Y, Han J, Jin T. Clinical features and management of coexisting anti-N-methyl-D-aspartate receptor encephalitis and myelin oligodendrocyte glycoprotein antibody-associated encephalomyelitis: a case report and review of the literature. *Neurol Sci*. 2021;42(3):847-55.
14. Caparo-Zamalloa C, Alvarez-Toledo K, Yamunaque-Chunga C, Castro-Suarez S, Guevara-Silva E, Osorio-Marcatinco V, et al. Autoimmune neurology: Co-occurrence of anti-NMDAR encephalitis and anti-MOG associated disease, report of a case. *J Neuroimmunol*. 2021;358:577663.
15. Ren BY, Guo Y, Han J, Wang Q, Li ZW. Case Report: Anti-NMDAR Encephalitis With Anti-MOG CNS Demyelination After Recurrent CNS Demyelination. *Front Neurol*. 2021;12:639265.
16. Cao L, Ren L, Huang X. Clinical analysis of a patient simultaneously positive for antibodies of myelin oligodendrocyte glycoprotein and anti-N-methyl-D-aspartate receptor: A case report. *Medicine (Baltimore)*. 2021;100(1):e24234.
17. Fujimori J, Takahashi T, Kaneko K, Atobe Y, Nakashima I. Anti-NMDAR encephalitis may develop concurrently with anti-MOG antibody-associated bilateral medial frontal cerebral cortical encephalitis and relapse with elevated CSF IL-6 and CXCL13. *Mult Scler Relat Disord*. 2021;47:102611.
18. Cherian A, Divya KP, Shetty SC, Kannoth S, Thomas B. Coexistent MOG, NMDAR, CASPR2 antibody positivity: Triumph over the triumvirate. *Mult Scler Relat Disord*. 2020;46:102468.
